# Supplementary material for: Solid State Fabrication of Copper Nanoclusters and Supraparticles
Source: MDPI journal article supplement (doi:10.3390/chemistry5030134), 2023-09-06
Supplement: s1 [file s1]

Archive with 1 entries (1 files):
- chemistry-2504708-supplementary.pdf
