# Supplementary material for: Solid State Fabrication of Copper Nanoclusters and Supraparticles
Source: MDPI journal article supplement (doi:10.3390/chemistry5030134), 2023-09-06
Supplement: s1 [file s1 › chemistry-2504708-supplementary.pdf]

## Supporting Information

### Solid State Fabrication of Copper nanoclusters and supraparticles

Rui Wang, Yunyun Zheng Yunsheng Xia\*

E-mail: xiayuns@mail.ahnu.edu.cn

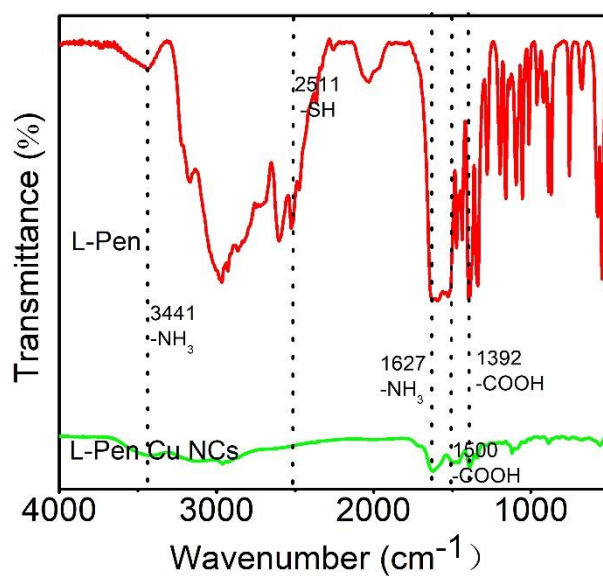

Figure S1 FTIR spectra of L-pen and the formed Cu NCs

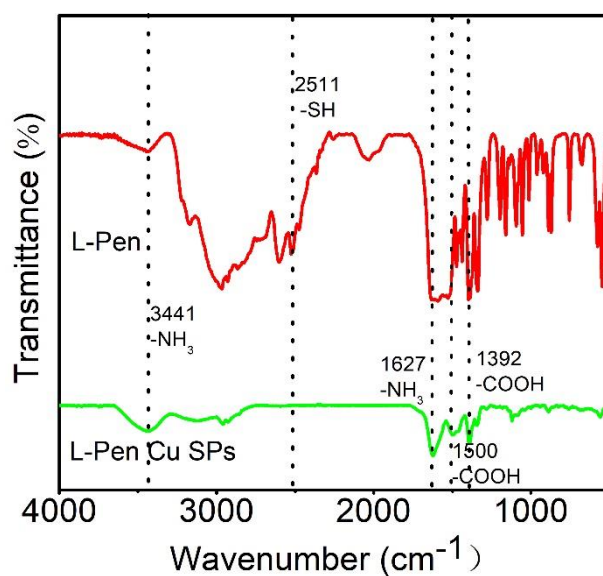

Figure S2 FTIR spectra of L-pen and the formed Cu SPs

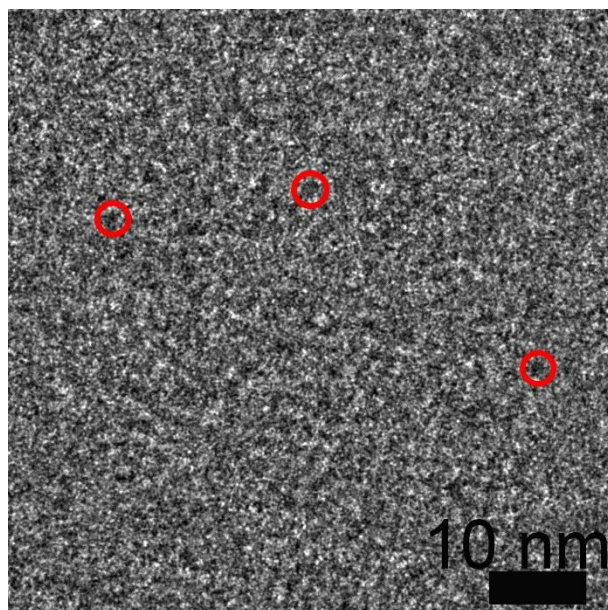

**Figure S3** Amplified HRTEM image of the Cu NCs.

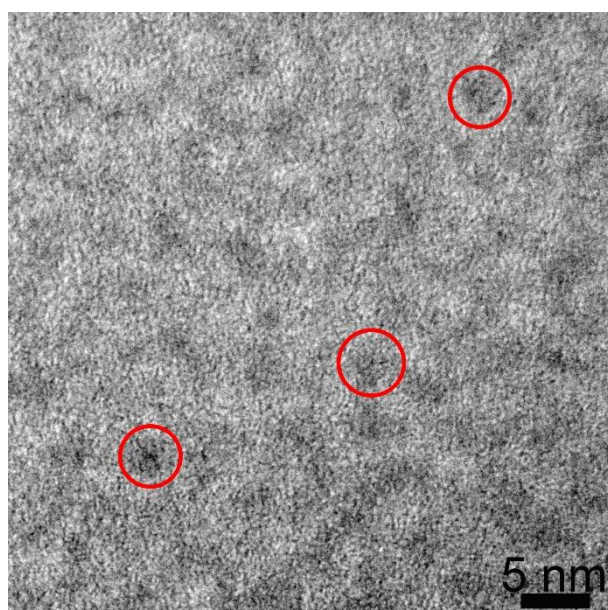

**Figure S4** Amplified HRTEM image of the Cu SPs.

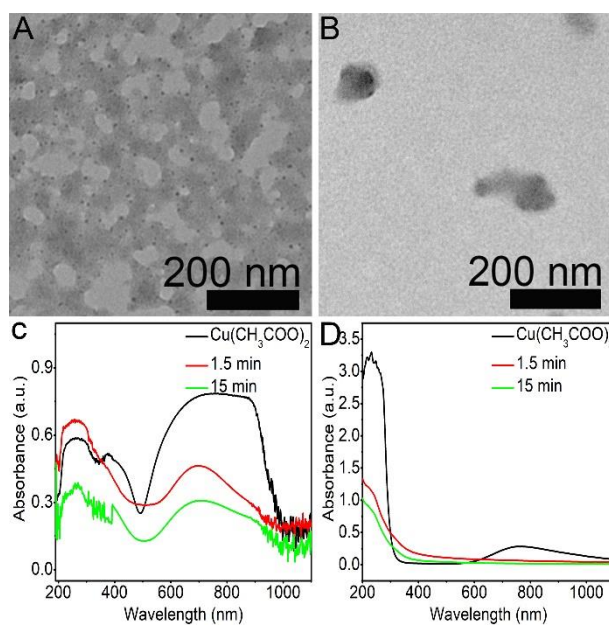

**Figure S5** The products obtained by different mechanical grinding time.

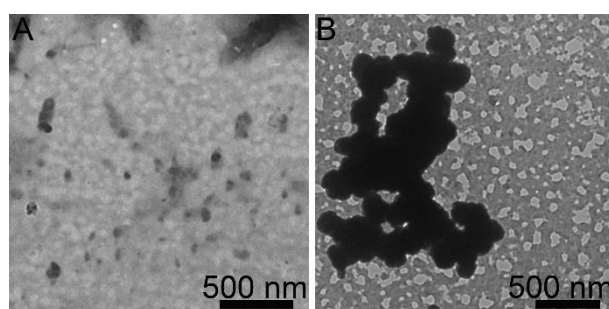

**Figure S6** The products obtained by 20 min manual grinding.
